# Supplementary material for: Quantum effect and Mo–N surface bonding states of α-MoC1−x modified carbon nitride for boosting photocatalytic performance
Source: Royal Society of Chemistry journal article supplement (doi:10.1039/d2cy01157c), 2022-01-01
Supplement: d2cy01157c1.pdf [file d2cy01157c1.pdf]

## Supporting Information

# Quantum effect and Mo-N surface bonding states of $\alpha$ -MoC<sub>1-x</sub> modified carbon nitride for boosting photocatalytic performance

*Zhi Zhu<sup>a</sup>, Reeti Kumar<sup>a</sup>, Liwen Luo<sup>a</sup>, Sunita Varjani<sup>b</sup>, Pengwei Huo<sup>c</sup>, Jonathan Woon-Chung<sup>a</sup> Wong\*, Jun Zhao<sup>a\*</sup>*

- a. Institute of Bioresource and Agriculture and Sino-Forest Applied Research Centre for Pearl River Delta Environment, Department of Biology, Hong Kong Baptist University, Kowloon Tong, Hong Kong, China
- b. Gujarat Pollution Control Board, Gandhinagar, Gujarat 382 010, India
- c. Institute of Green Chemistry and Chemical Technology, School of Chemistry & Chemical Engineering, Jiangsu University, Zhenjiang 212013, PR China.

### Corresponding author:

Jonathan Woon-Chung WONG, E-mail: [jwchwong@hkbu.edu.hk](mailto:jwchwong@hkbu.edu.hk),

Jun ZHAO, Email: [zhaojun@hkbu.edu.hk](mailto:zhaojun@hkbu.edu.hk)

## Photocatalyst Synthesis

### 1) Synthesis of g-C<sub>3</sub>N<sub>4</sub> (CN)

Melamine (3.0 g) was calcined in temperature-programmed muffle furnace for 2 h at 500 °C, then heated up to 550 °C for another 2 h, with the same heating rate (2.3 °C · min<sup>-1</sup>) under N<sub>2</sub> atmosphere, then get the pure CN.

### 2) Synthesis of $\alpha$ -MoC<sub>1-x</sub> quantum dot ( $\alpha$ -MoC<sub>1-x</sub>-QDs)

0.5 g (NH<sub>4</sub>)<sub>6</sub>Mo<sub>7</sub>O<sub>24</sub>·4H<sub>2</sub>O and 3.0 g melamine are grinding evenly. Then the hybrid precursor was annealed in N<sub>2</sub> atmosphere at 400 °C for 2 h with a heating rate of 1 °C min<sup>-1</sup>, then 800 °C for 2 h with heating rate of 2 °C min<sup>-1</sup>, naturally cooled to ambient temperature under N<sub>2</sub>. The obtained quantum dot cocatalyst is denoted as  $\alpha$ -MoC<sub>1-x</sub>-QDs.

### 3) Synthesis of $\alpha$ -MoC<sub>1-x</sub> quantum dot modified CN ( $\alpha$ -MoC<sub>1-x</sub>-QDs/CN)

Different amount of the obtained  $\alpha$ -MoC<sub>1-x</sub>-QDs (0.01, 0.05, 0.1 g) and melamine (3.0 g) are grinding evenly, respectively. After that, the above mixture is dispersed into 20 mL solution ( $V_{\text{ethanol}}/V_{\text{water}} = 1:3$ ) within ultrasonic 5.0 h, and then evaporated in a water bath to get a well-dispersed mixture. Finally, transferred it to a temperature-programmed muffle furnace for calcining 2 h at 500 °C, then heated it up to 550 °C for another 2 h, with the same heating rate (2.3 °C · min<sup>-1</sup>) under N<sub>2</sub> atmosphere, get the  $\alpha$ -MoC<sub>1-x</sub>-QDs/CN. Finally, the product named of  $\alpha$ -MoC<sub>1-x</sub>-QDs/CN-0.01,  $\alpha$ -MoC<sub>1-x</sub>-QDs/CN-0.05,  $\alpha$ -MoC<sub>1-x</sub>-QDs/CN-0.1 corresponding the content  $\alpha$ -MoC<sub>1-x</sub>-QDs (0.01, 0.05, 0.1 g).

## Photoelectrochemical Measurements

Photo-electrochemical performance of the as-prepared photocatalyst is investigated by photocurrent response by CHI 660C electrochemical station. Briefly, 0.01 g photocatalyst is dispersed in 0.5 mL ethanol and 0.1 mL oleic acid, and then take 100  $\mu$ L of the catalyst colloid was spread on the pretreated FTO (1.0 $\times$ 1.0 cm<sup>2</sup>), dried in air at room temperature and used as corresponding working electrodes. A Pt electrode is used as the counter electrode and an Ag/AgCl electrode in saturated KCl solution is employed as the reference electrode.

## Adsorption Experiments.

The adsorption performances of different catalyst investigated by batching adsorbing experiment. In brief, 80 mg of photocatalysts was mixed with 100 mL of tetracycline aqueous solution (initial concentrations: 20 mg L<sup>-1</sup>). After an immersion of 1.0 h, the solution was separated and analyzed to 150 determine the remaining concentration of tetracycline by using a UV-vis spectrophotometer. The adsorption quantity of tetracycline by difference photocatalyst was calculated according to final and initial concentrations of the solution.

## Photocatalytic Experiments

The photocatalytic performance of the prepared photocatalyst was evaluated by decomposition

of tetracycline. a 250 W xenon lamp covered with a UV filter ( $\lambda > 420$  nm) was used as the light source, at room temperature (25 °C). 50 mg of the as-prepared photocatalyst was totally suspended in an aqueous solution of tetracycline (100 mL, 20 mg L<sup>-1</sup>). For optimally dispersed system, the suspension was magnetically stirred in dark 1.0 h to reach adsorption/desorption equilibration. Air was blown into the aqueous solution during the whole reaction process. At irradiation time interval of 30 min, 2 mL solution was taken out and magnet separated, and then the absorbance of tetracycline (TC) was determined by UV/visible spectrum. The free radicals capture experiments were put into force by adding EDTA-2Na and isopropanol (IPA) and VC during the photocatalytic degradation process, respectively. The change in the concentration of tetracycline solution was measured by UV/visible spectrophotometer. The degradation efficiency was computed by  $\eta = (C_0 - Ct)/C_0$ , where  $\eta$  is the photocatalytic degradation efficiency,  $C_0$  is the original concentration before illumination, and  $Ct$  is the concentration of tetracycline after visible light irradiation.

### Computational method

We have employed the Vienna Ab Initio Package (VASP) <sup>11, 21</sup> to perform all the density functional theory (DFT) calculations within the generalized gradient approximation (GGA) using the PBE <sup>13</sup> formulation. We have chosen the projected augmented wave (PAW) potentials <sup>14, 51</sup> to describe the ionic cores and take valence electrons into account using a plane wave basis set with a kinetic energy cutoff of 400 eV. Partial occupancies of the Kohn–Sham orbitals were allowed using the Gaussian smearing method and a width of 0.05 eV. The electronic energy was considered self-consistent when the energy change was smaller than 10<sup>-5</sup> eV. A geometry optimization was considered convergent when the force change was smaller than 0.02 eV/Å. Grimme’s DFT-D3 methodology <sup>16</sup> was used to describe the dispersion interactions.

The equilibrium lattice constant of hexagonal g-C<sub>3</sub>N<sub>4</sub> monolayer unit cell in a vacuum in the depth of 20 Å was optimized, when using a 9×9×4 Monkhorst-Pack k-point grid for Brillouin zone sampling, to be  $a=7.136$  Å. We then use it to construct a g-C<sub>3</sub>N<sub>4</sub>(001) monolayer model with  $p$  (3×3) periodicity in the x and y directions and a vacuum layer in the depth of 20 Å in the z direction in order to separate the surface slab from its periodic duplicates. This g-C<sub>3</sub>N<sub>4</sub>(001) model contains 54 C and 72 N atoms. In another model, a Mo<sub>13</sub>C<sub>13</sub> cluster cut out of MoC was put onto the g-C<sub>3</sub>N<sub>4</sub>(001) model. During structural optimizations, the gamma point in the Brillouin zone was used for k-point sampling, and all atoms allowed to relax.

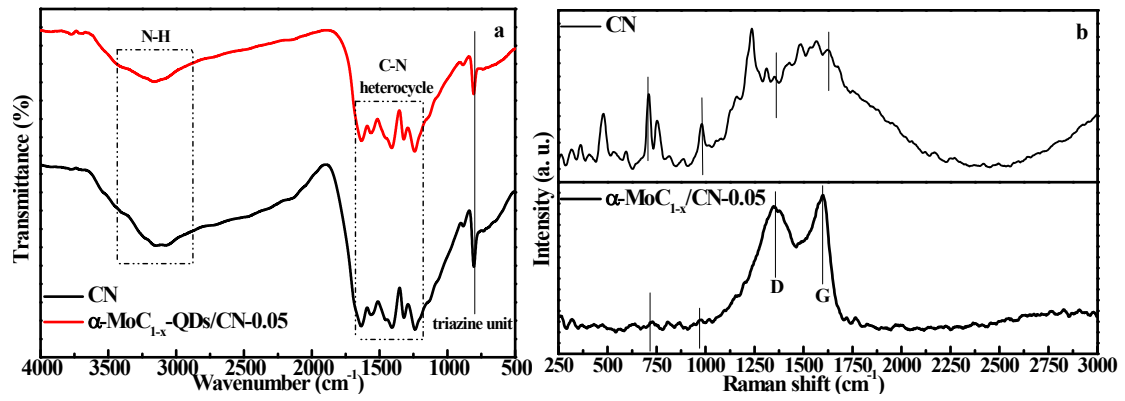

Fig. S1. FTIR and Raman data of pure CN,  $\alpha\text{-MoC}_{1-x}\text{/CN-0.05}$

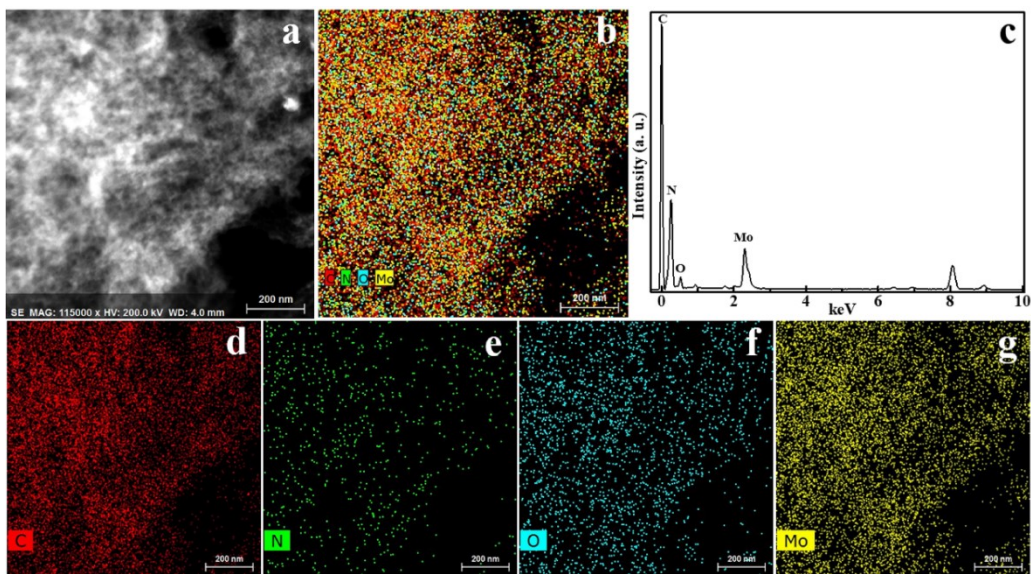

Fig. S2 EDX elemental mapping for C, N, O, Mo elements over  $\alpha\text{-MoC}_{1-x}\text{-QDs}$  photocatalyst.

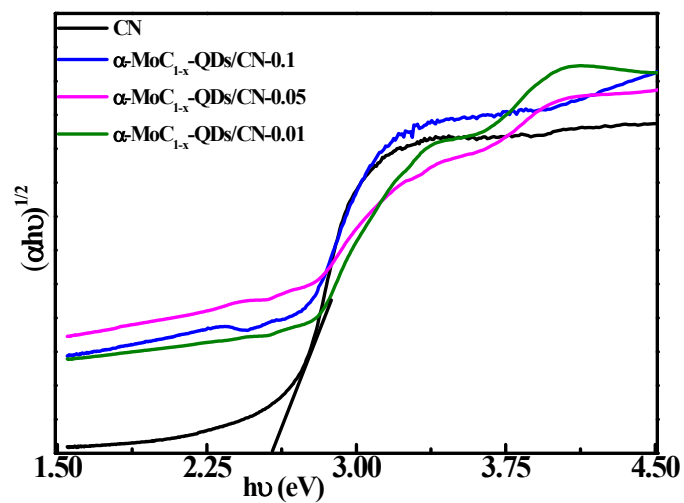

Fig. S3 Tauc plots of CN and  $\alpha\text{-MoC}_{1-x}\text{-QDs/CN}$  photocatalyst.

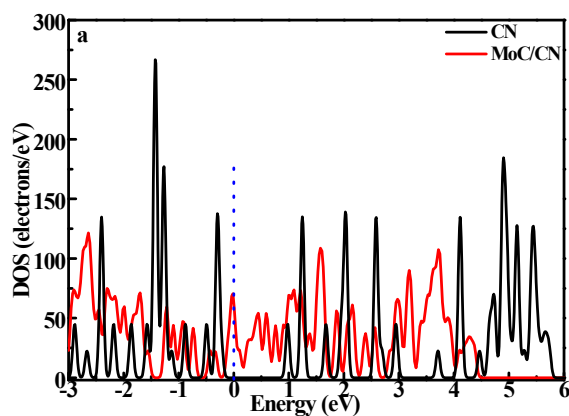

**Fig. S4** The total density of states of CN and  $\alpha$ -MoC<sub>1-x</sub>/CN (the dash line is the Fermi level set at zero).

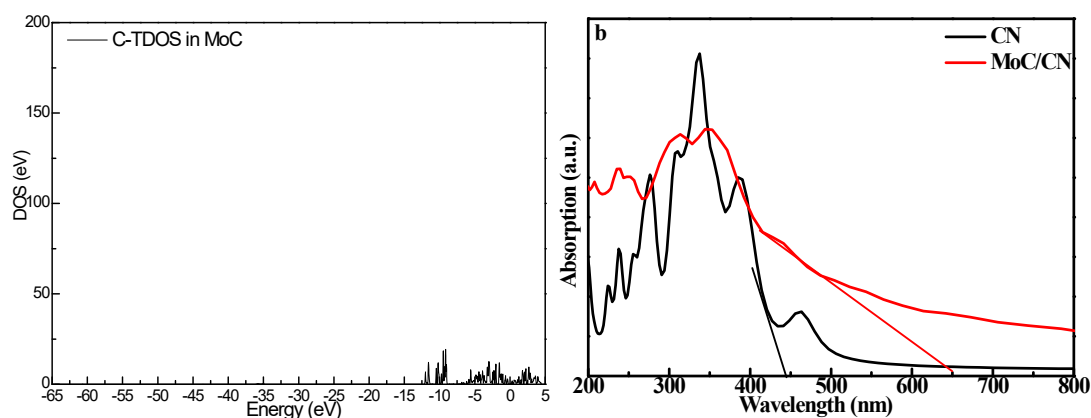

**Fig. S5** The total density of states of C of  $\alpha$ -MoC<sub>1-x</sub> from MoC<sub>1-x</sub>/CN (a), light absorption curves by DFT of CN and  $\alpha$ -MoC<sub>1-x</sub>/CN (b)

## References

1. Kresse, G.; Furthmüller, J. Efficiency of Ab-Initio Total Energy Calculations for Metals and Semiconductors Using a Plane-Wave Basis Set. *Comput. Mater. Sci.* 1996, 6, 15–50.
2. Kresse, G.; Furthmüller, J. Efficient Iterative Schemes for Ab Initio Total-Energy Calculations Using a Plane-Wave Basis Set. *Phys. Rev. B* 1996, 54, 11169–11186.
3. Perdew, J. P.; Burke, K.; Ernzerhof, M. Generalized Gradient Approximation Made Simple. *Phys. Rev. Lett.* 1996, 77, 3865–3868.
4. Kresse, G.; Joubert, D. From Ultrasoft Pseudopotentials to the Projector Augmented-Wave Method. *Phys. Rev. B* 1999, 59, 1758-1775.
5. Blöchl, P. E. Projector Augmented-Wave Method. *Phys. Rev. B* 1994, 50, 17953–17979.
6. Grimme, S.; Antony, J.; Ehrlich, S.; Krieg, H. *J. Chem. Phys.* 2010, 132, 154104.
